# Supplementary material for: Synthesis, characterization and third order nonlinear optical properties of trans-A2B-type cobalt corroles
Source: Royal Society of Chemistry journal article supplement (doi:10.1039/d0nj05436d), 2020-12-18
Supplement: d0nj05436d1.pdf [file d0nj05436d1.pdf]

## Electronic Supplementary Information

### **Synthesis, characterization and third order nonlinear optical properties of *trans*-A<sub>2</sub>B-type cobalt corroles**

**Guifen Lu,\* Peng Zhang, Yuanyuan Fang, Yongjie Gao, Qikang Hu**

*School of Chemistry and Chemical Engineering, Jiangsu University, Zhenjiang 212013, P. R. China*

**Materials.** Reagents and solvents (Sinopharm or Aldrich) were of the highest grade available and were used without further purification, except for  $\text{CH}_2\text{Cl}_2$ , which was distilled under reduced pressure prior to use from  $\text{P}_2\text{O}_5$ . Tetra-*n*-butylammonium perchlorate (TBAP), as supporting electrolyte, was recrystallized from ethyl alcohol, and dried under vacuum at 40 °C for at least 1 week prior to use.

**Physical Measurements.** IR spectra (KBr pellets) were recorded on AVATAR-370 spectrometer.  $^1\text{H}$ NMR spectra were recorded in a  $\text{CDCl}_3$  solution at 400 MHz using a Bruker Advance 400 spectrometer at 25 °C. Chemical shifts (ppm) were determined with TMS as the internal reference. MALDI-TOF mass spectra were carried out on a Bruker BIFLEX III ultrahigh resolution Fourier transform ion cyclotron resonance (FT-ICR) mass spectrometer with  $\alpha$ -cyano-4-hydroxycinnamic acid as matrix. The fluorescence spectrum was recorded on a CaryEclipse fluorescence spectrophotometer.

**Electrochemistry.** Cyclic voltammetry was carried out at 298 K using a CHI-730C Electrochemical Workstation. A homemade three-electrode cell was used for cyclic voltammetric measurements and consisted of a glassy carbon working electrode, a platinum counter electrode and a homemade saturated calomel reference electrode (SCE). The SCE was separated from the bulk of the solution by a fritted glass bridge of low porosity which contained the solvent/supporting electrolyte mixture. All potentials are referenced to the SCE. High purity  $\text{N}_2$  was used to deoxygenate the solution and a stream of nitrogen gas was kept over the solution during each electrochemical experiment.

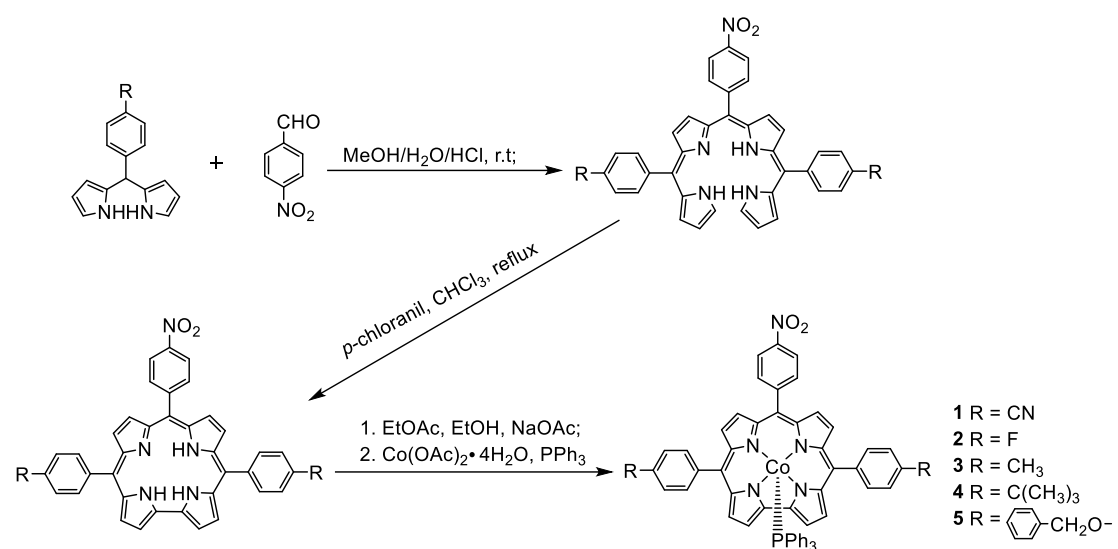

**Scheme S1.** Synthetic route for compounds [Cor(*p*-RPh)<sub>2</sub>(*p*-NO<sub>2</sub>Ph)]Co(PPh<sub>3</sub>) **1-5**.

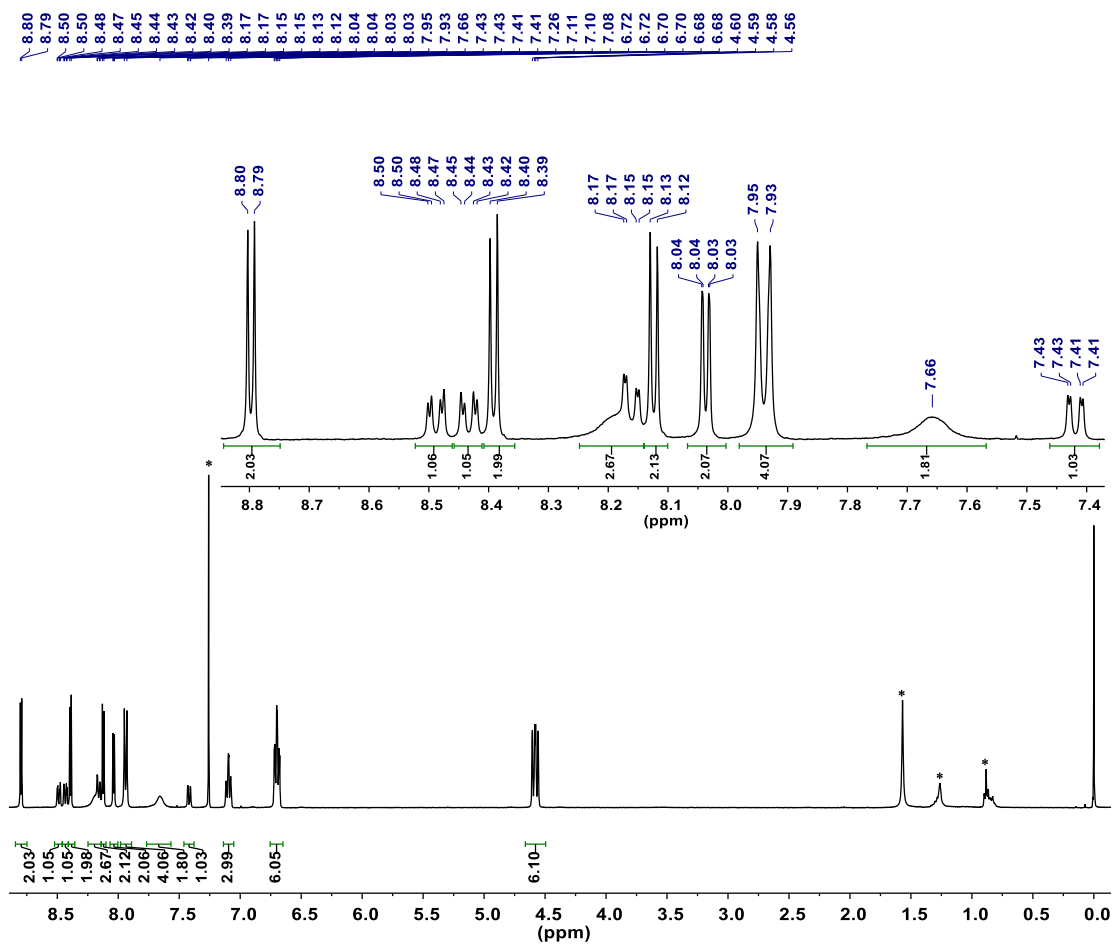

**Fig. S1.** <sup>1</sup>H NMR spectrum of [Cor(*p*-CNPh)<sub>2</sub>(*p*-NO<sub>2</sub>Ph)]Co(PPh<sub>3</sub>) (**1**) (\* 7.26 ppm is the solvent peak of CDCl<sub>3</sub>, 1.56 ppm is the peak of H<sub>2</sub>O, 0.88 and 1.26 ppm are solvent peaks from *n*-hexane).

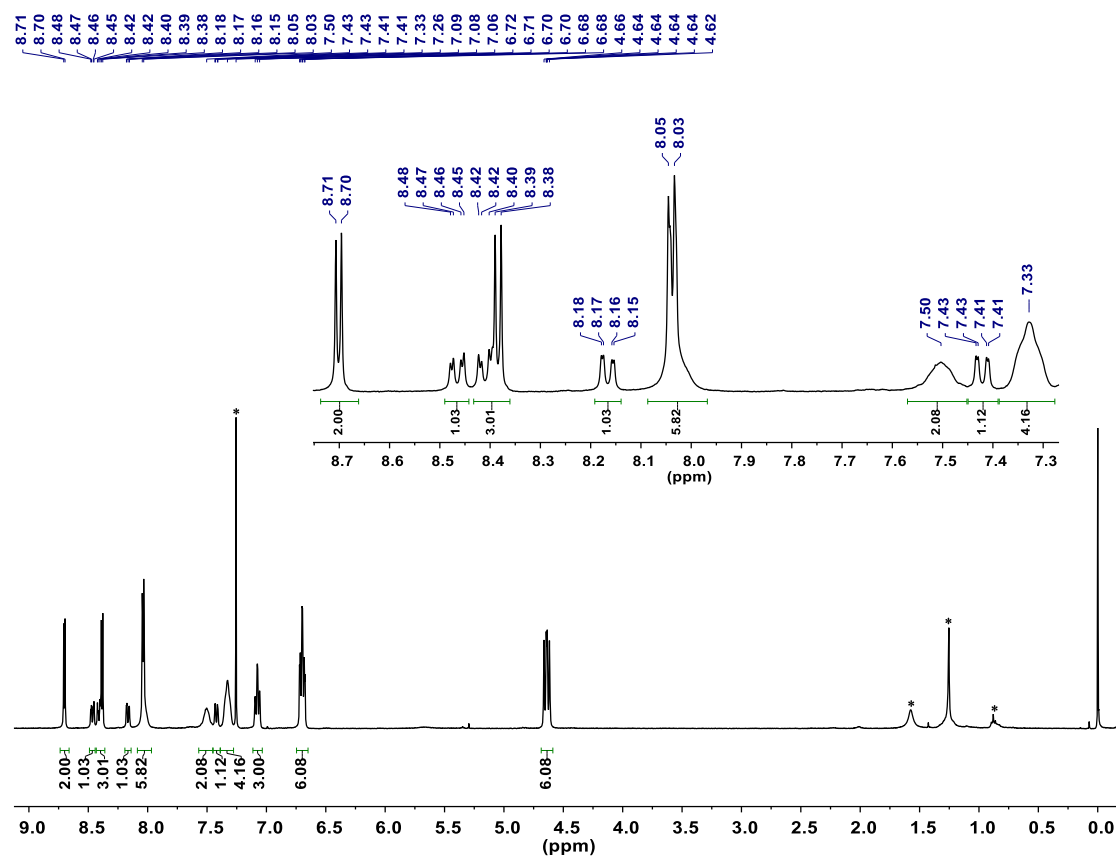

**Fig. S2.**  $^1\text{H}$  NMR spectrum of  $[\text{Co}(p\text{-FPh})_2(p\text{-NO}_2\text{Ph})]\text{Co}(\text{PPh}_3)$  (**2**) (\* 7.26 ppm is the solvent peak of  $\text{CDCl}_3$ , 1.56 ppm is the peak of  $\text{H}_2\text{O}$ , 0.88 and 1.26 ppm are solvent peaks from *n*-hexane).

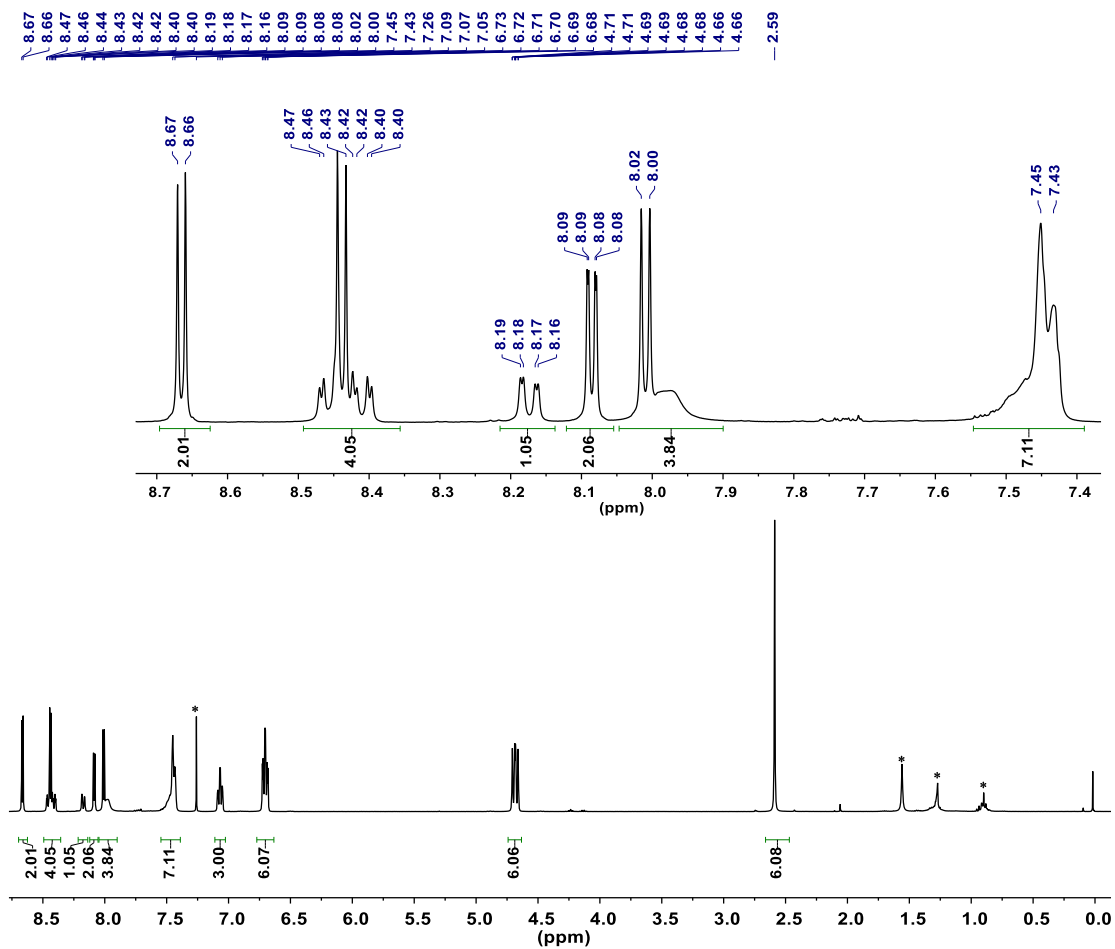

**Fig. S3.** <sup>1</sup>H NMR spectrum of [Cor(*p*-CH<sub>3</sub>Ph)<sub>2</sub>(*p*-NO<sub>2</sub>Ph)]Co(PPh<sub>3</sub>) (**3**) (\* 7.26 ppm is the solvent peak of CDCl<sub>3</sub>, 1.56 ppm is the peak of H<sub>2</sub>O, 0.88 and 1.26 ppm are solvent peaks from *n*-hexane).

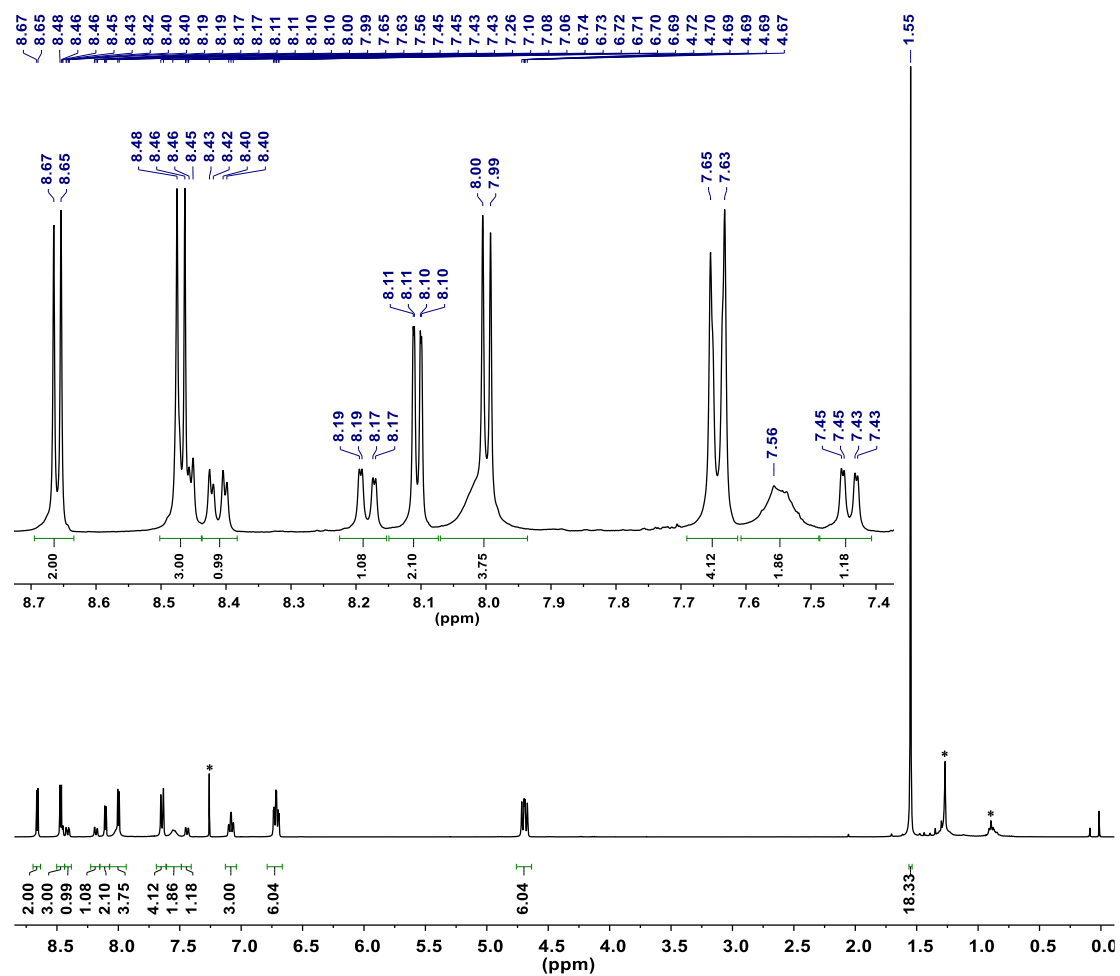

**Fig. S4.**  $^1\text{H}$  NMR spectrum of  $[\text{Co}(\text{p-C}(\text{CH}_3)_3\text{Ph})_2(\text{p-NO}_2\text{Ph})]\text{Co}(\text{PPh}_3)$  (**4**) (\* 7.26 ppm is the solvent peak of  $\text{CDCl}_3$ , 0.88 and 1.26 ppm are solvent peaks from *n*-hexane).

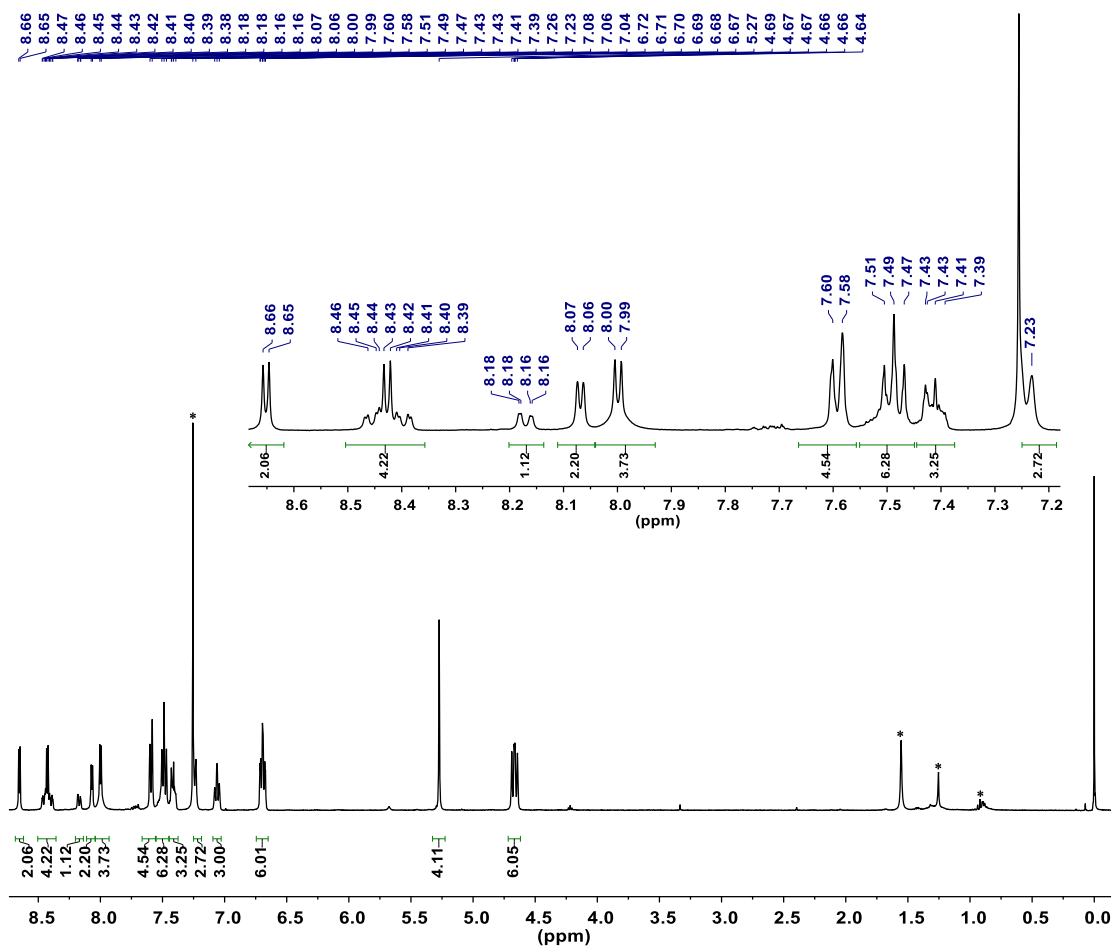

**Fig. S5.** <sup>1</sup>H NMR spectrum of [Cor(*p*-PhCH<sub>2</sub>OPh)<sub>2</sub>(*p*-NO<sub>2</sub>Ph)]Co(PPh<sub>3</sub>) (**5**) (\* 7.26 ppm is the solvent peak of CDCl<sub>3</sub>, 1.56 ppm is the peak of H<sub>2</sub>O, 0.88 and 1.26 ppm are solvent peaks from *n*-hexane).



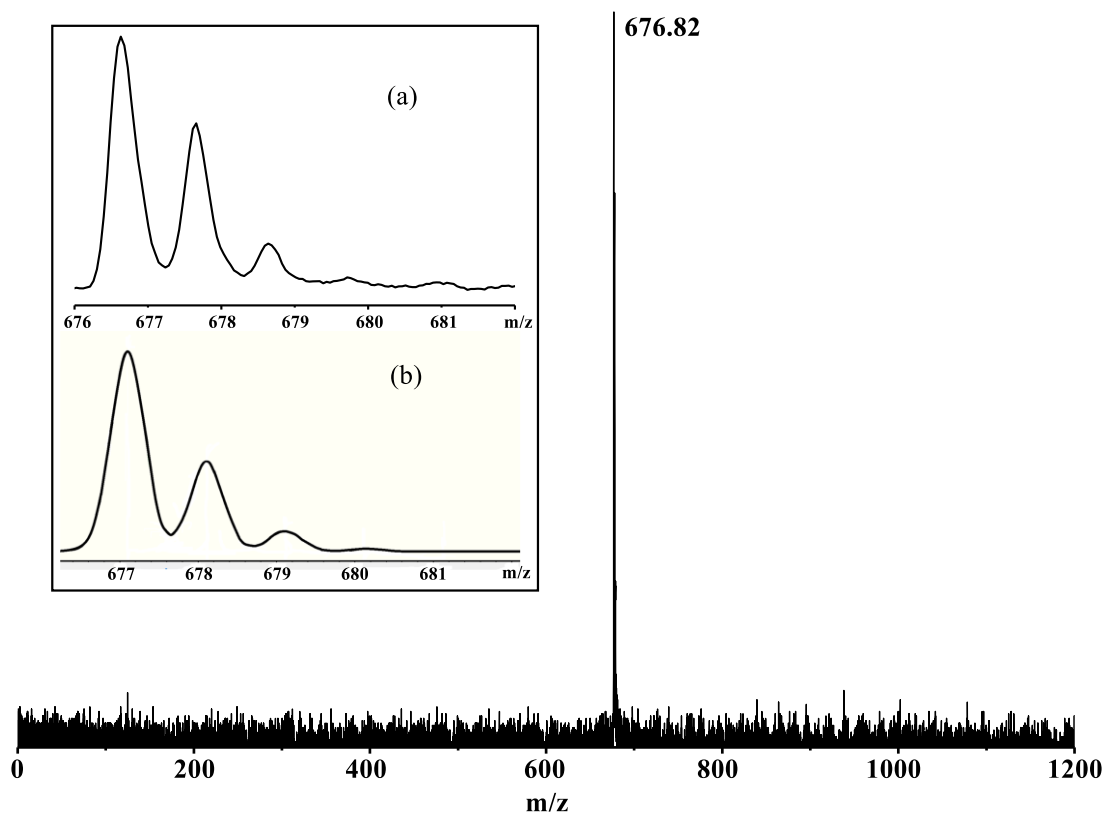

**Fig. S6.** MALDI-TOF mass spectrum of  $[\text{Co}(p\text{-CNPh})_2(p\text{-NO}_2\text{Ph})]\text{Co}(\text{PPh}_3)$  (**1**). The inset shows experimental (a) and simulated isotopic pattern (b) for the molecular ion of compound **1**.

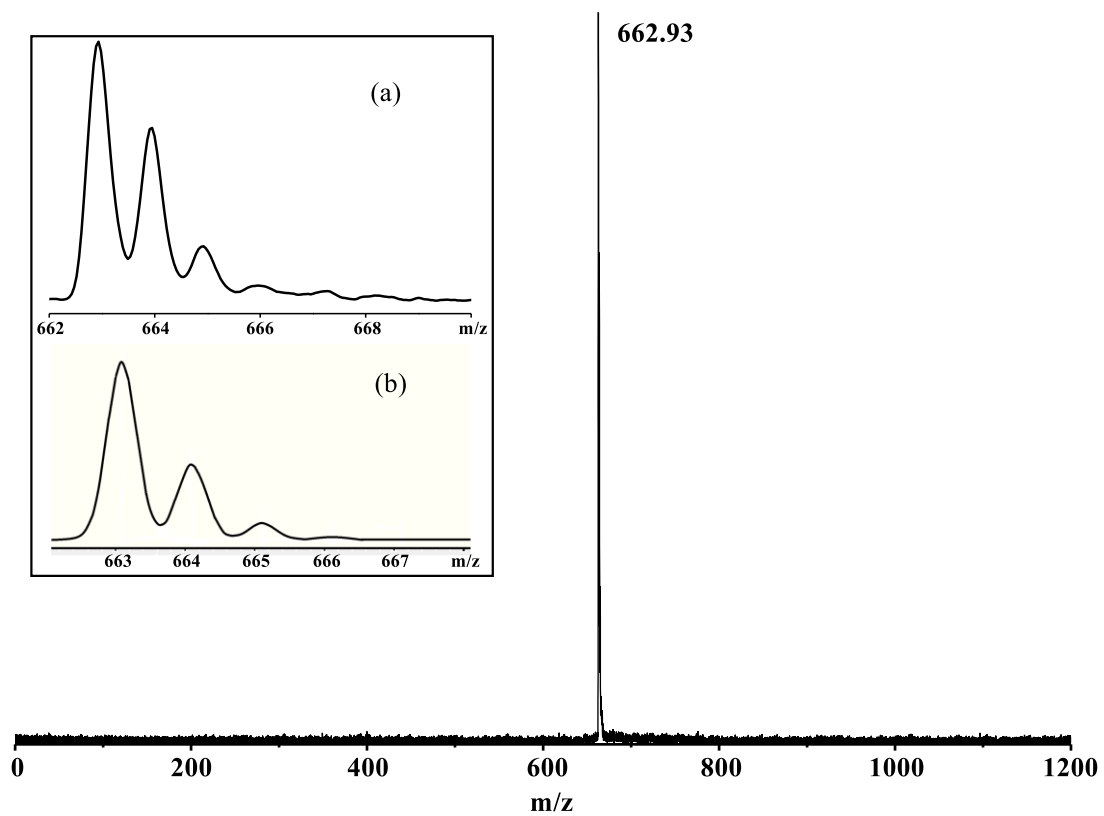

**Fig. S7.** MALDI-TOF mass spectrum of  $[\text{Co}(p\text{-FPh})_2(p\text{-NO}_2\text{Ph})]\text{Co}(\text{PPh}_3)$  (**2**). The inset shows experimental (a) and simulated isotopic pattern (b) for the molecular ion of compound **2**.

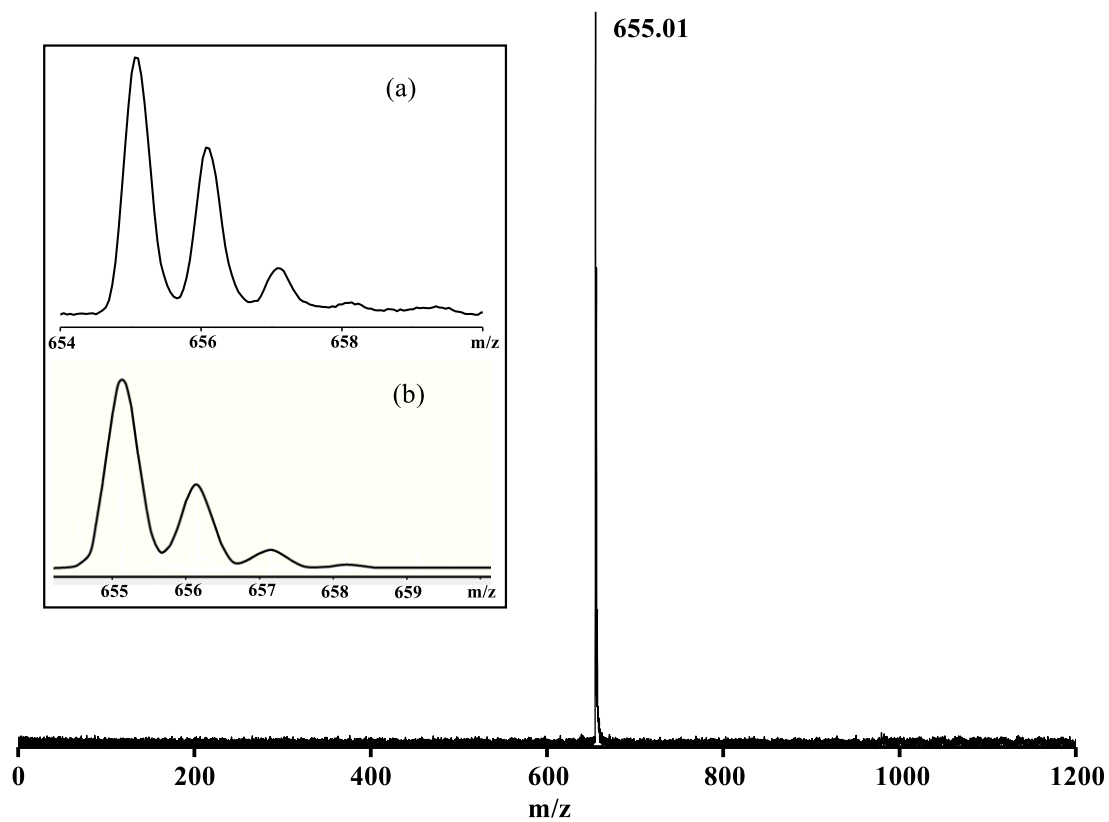

**Fig. S8.** MALDI-TOF mass spectrum of  $[\text{Co}(p\text{-CH}_3\text{Ph})_2(p\text{-NO}_2\text{Ph})]\text{Co}(\text{PPh}_3)$  (**3**). The inset shows experimental (a) and simulated isotopic pattern (b) for the molecular ion of compound **3**.

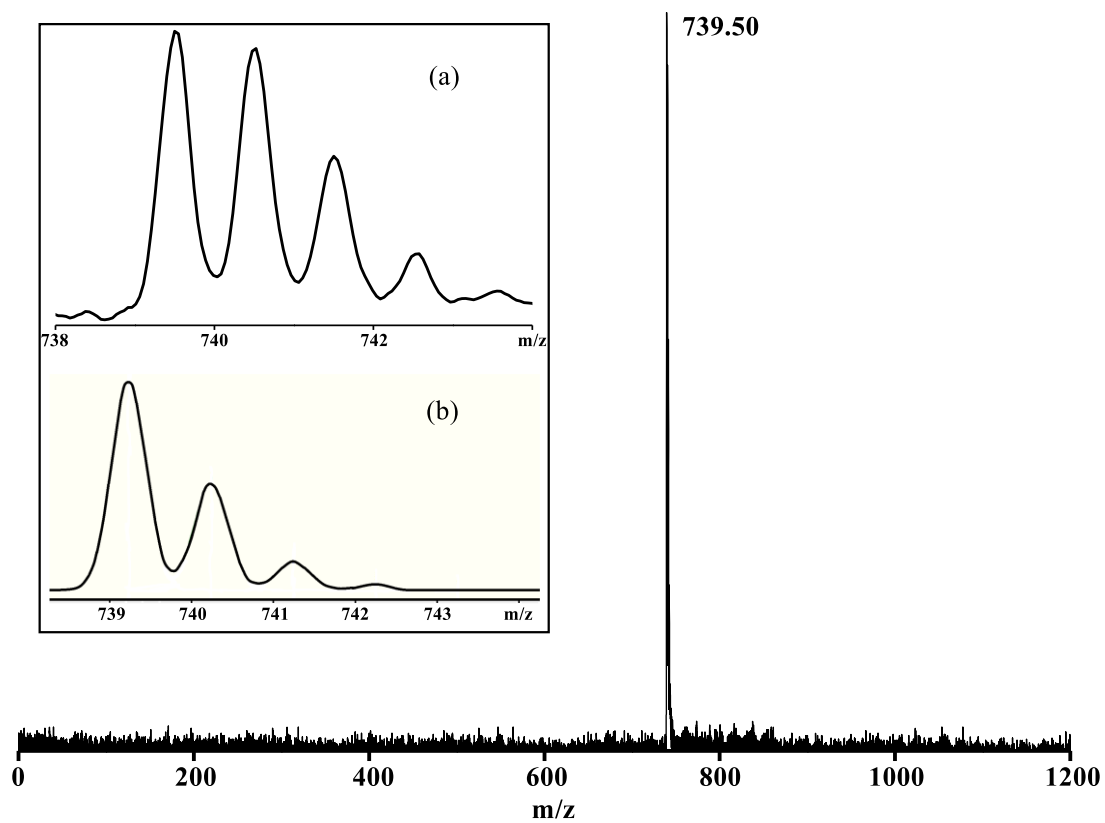

**Fig. S9.** MALDI-TOF mass spectrum of  $[\text{Co}(p\text{-C}(\text{CH}_3)_3\text{Ph})_2(p\text{-NO}_2\text{Ph})]\text{Co}(\text{PPh}_3)$  (**4**). The inset shows experimental (a) and simulated isotopic pattern (b) for the molecular ion of compound **4**.

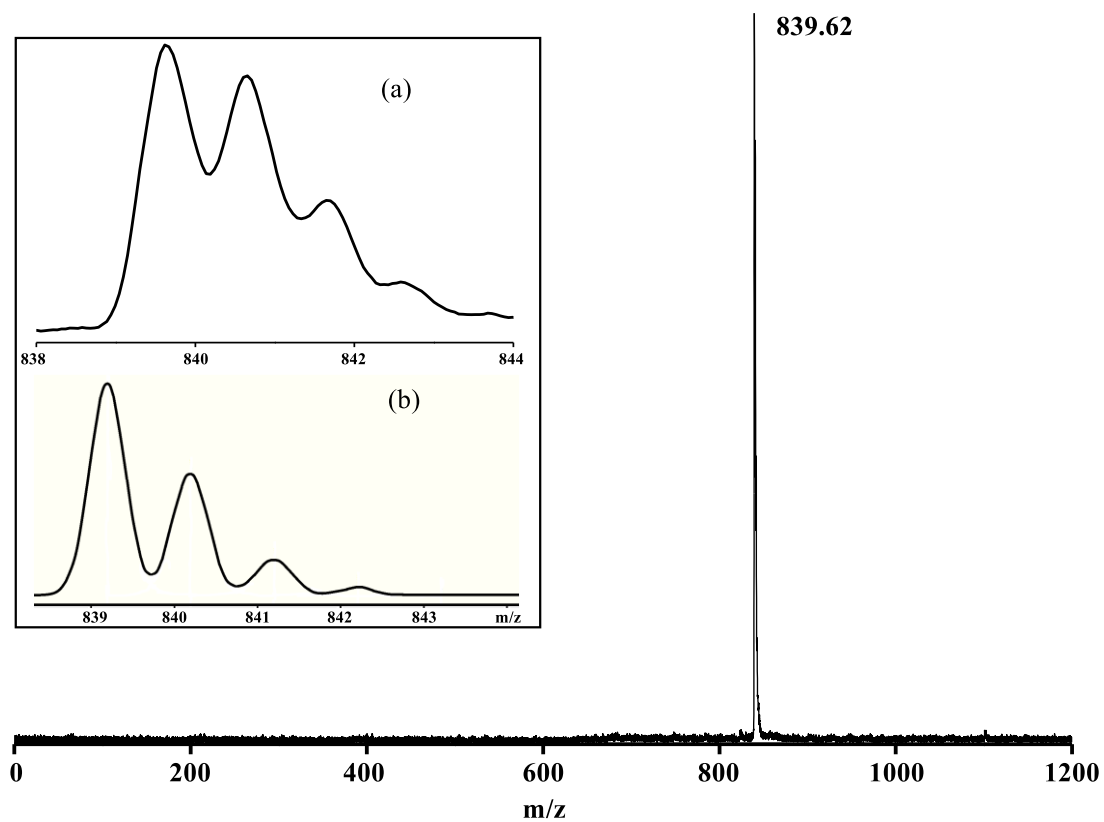

**Fig. S10.** MALDI-TOF mass spectrum of  $[\text{Co}(p\text{-PhCH}_2\text{OPh})_2(p\text{-NO}_2\text{Ph})]\text{Co}(\text{PPh}_3)$  (**5**). The inset shows experimental (a) and simulated isotopic pattern (b) for the molecular ion of compound **5**.

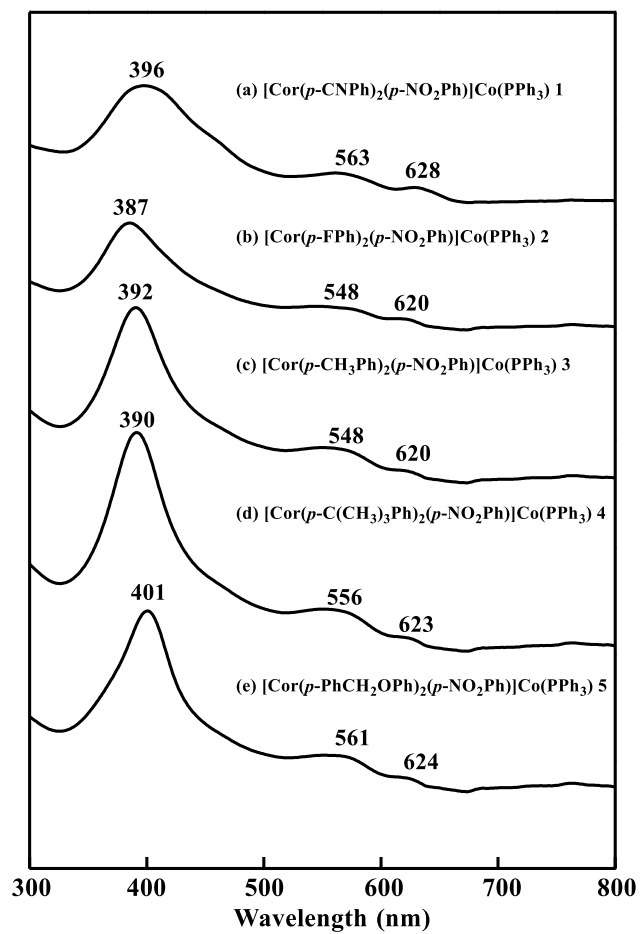

**Fig. S11.** Electronic absorption spectra of compounds  $[\text{Co}(\textit{p}\text{-RPh})_2(\textit{p}\text{-NO}_2\text{Ph})]\text{Co}(\text{PPh}_3)_3$  (**1-5**) in DMF.

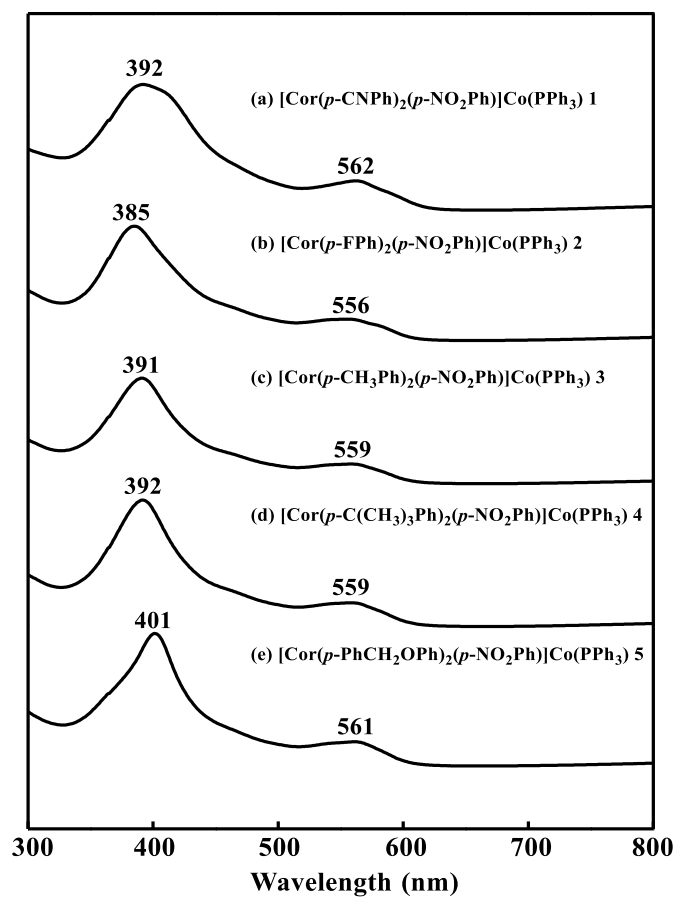

**Fig. S12.** Electronic absorption spectra of compounds  $[\text{Co}(\text{p-RPh})_2(\text{p-NO}_2\text{Ph})]\text{Co}(\text{PPh}_3)$  (1-5) in DMA.

**Table S1.** Electronic absorption data for [Cor(*p*-RPh)<sub>2</sub>(*p*-NO<sub>2</sub>Ph)]Co(PPh<sub>3</sub>) (**1-5**) in CH<sub>2</sub>Cl<sub>2</sub>, DMF and DMA.

| Solvent                         | R                                | $\lambda_{\max}$ / [nm, $\epsilon \times 10^{-5}$ (L mol <sup>-1</sup> cm <sup>-1</sup> )] |              |              |
|---------------------------------|----------------------------------|--------------------------------------------------------------------------------------------|--------------|--------------|
| CH <sub>2</sub> Cl <sub>2</sub> | CN                               | 392 (1.0715)                                                                               | 568 (0.2258) |              |
|                                 | F                                | 386 (1.4355)                                                                               | 553 (0.2792) |              |
|                                 | CH <sub>3</sub>                  | 391 (0.9249)                                                                               | 560 (0.1414) |              |
|                                 | C(CH <sub>3</sub> ) <sub>3</sub> | 393 (0.8006)                                                                               | 556 (0.1534) |              |
|                                 | PhCH <sub>2</sub> O              | 403 (1.7869)                                                                               | 569 (0.2604) |              |
| DMF                             | CN                               | 396 (0.5440)                                                                               | 563 (0.1398) | 628 (0.0720) |
|                                 | F                                | 387 (0.4811)                                                                               | 548 (0.0885) | 620 (0.0297) |
|                                 | CH <sub>3</sub>                  | 392 (0.8067)                                                                               | 548 (0.1344) | 620 (0.0271) |
|                                 | C(CH <sub>3</sub> ) <sub>3</sub> | 390 (1.0095)                                                                               | 556 (0.1647) | 623 (0.0309) |
|                                 | PhCH <sub>2</sub> O              | 401 (0.8260)                                                                               | 561 (0.1305) | 624 (0.0229) |
| DMA                             | CN                               | 392 (0.6253)                                                                               | 562 (0.1527) |              |
|                                 | F                                | 385 (0.5651)                                                                               | 556 (0.1094) |              |
|                                 | CH <sub>3</sub>                  | 391 (0.5214)                                                                               | 559 (0.1003) |              |
|                                 | C(CH <sub>3</sub> ) <sub>3</sub> | 392 (0.6250)                                                                               | 559 (0.1215) |              |
|                                 | PhCH <sub>2</sub> O              | 401 (0.6552)                                                                               | 561 (0.1243) |              |



**Table S2.** Characteristic IR bands ( $\text{cm}^{-1}$ ) of corrole for  $[\text{Cor}(p\text{-RPh})_2(p\text{-NO}_2\text{Ph})]\text{Co}(\text{PPh}_3)$  (**1-5**) with  $2 \text{ cm}^{-1}$  resolution.

| CN    | F     | CH <sub>3</sub> | C(CH <sub>3</sub> ) <sub>3</sub> | PhCH <sub>2</sub> O | Assignment                                                                                   |
|-------|-------|-----------------|----------------------------------|---------------------|----------------------------------------------------------------------------------------------|
| 413w  | 418w  |                 |                                  |                     | C-C-C out-of-plane wag of phenyl                                                             |
| 458w  | 459w  |                 |                                  | 457w                | Coupling the Pyrrole in plane bending and C-C-C out-of-plane wag of phenyl                   |
| 499w  | 499w  | 499w            | 499w                             | 499w                | Pyrrole in-plane rotation                                                                    |
| 521s  | 522s  | 519s            | 521s                             | 520s                | Pyrrole in plane bending                                                                     |
| 576w  | 576w  | 576w            | 585w                             | 575w                | C(10- <i>meso</i> )-C(Pyrrole) out-of-plane bending                                          |
| 618w  | 616w  | 616w            | 618w                             | 618w                | C-C-C in plane deformation of phenyl groups                                                  |
| 695s  | 694s  | 693s            | 695s                             | 695s                | C-H out-of-plane wag of the Pyrrole                                                          |
| 714s  | 721s  | 719s            | 716s                             | 714s                | C-H out-of-plane wag of the Pyrrole                                                          |
| 747m  | 747m  | 747m            | 742m                             | 746m                | C-H out-of-plane wag of the phenyl groups                                                    |
|       |       |                 | 749a                             |                     | C-H out-of-plane wag of the phenyl groups                                                    |
| 786m  | 786m  | 784m            | 785m                             | 785m                | Pyrrole in-plane deformation                                                                 |
|       |       | 807m            |                                  |                     | Pyrrole in-plane bending                                                                     |
| 820s  | 820s  | 820s            | 821s                             | 822s                | Pyrrole in-plane bending                                                                     |
| 846w  | 845w  | 845m            | 845m                             | 845m                | Coupling of Pyrrole stretching and the out of plane C-H wag                                  |
| 881w  | 880w  | 880w            | 881w                             | 880w                | C-H in-plane bending of the Pyrrole                                                          |
| 985m  | 986m  | 985m            | 985m                             | 985m                | Coupling the breathing vibration of the phenyl groups and the corrole skeleton               |
| 1013s | 1016s | 1017s           | 1018s                            | 1015s               | Coupling C-H in plane bending of phenyl groups and porrole breathing                         |
| 1053m | 105s  | 1052m           | 1052m                            | 1050m               | C-H bending of the Pyrrole                                                                   |
| 1088w | 1088w | 1088w           | 1088w                            | 1088w               | C-H in plane bending of the phenyl groups                                                    |
| 1109w | 1109w | 1109w           | 1109w                            | 1109w               | Phenyl groups in plane breathing                                                             |
| 1190w | 1160s | 1184w           | 1190w                            |                     | C-H bending of the Pyrrole                                                                   |
|       |       |                 |                                  | 1172s               | Ar-O-C stretching ( <i>sym</i> )                                                             |
|       | 1221s |                 |                                  |                     | C-F stretching                                                                               |
| 1226w | 1229s | 1226w           | 1226w                            | 1224w               | Coupling of the C(10- <i>meso</i> )-C(phenyl groups) stretching and Pyrrole in plane bending |

|        |        |        |        |        |                                                                                          |
|--------|--------|--------|--------|--------|------------------------------------------------------------------------------------------|
| 1249w  | 1250w  | 1248w  | 1249w  |        | Coupling the C(5, 15- <i>meso</i> )-C(phenyl groups) stretching and Pyrrole stretching   |
|        |        |        |        | 1242s  | Ar-O-C stretching ( <i>asym</i> )                                                        |
| 1319w  | 1316m  | 1318w  | 1319w  | 1316w  | Pyrrole stretching                                                                       |
| 1345vs | 1343vs | 1341vs | 1340vs | 1342s  | Coupling the stretch of pyrrole, C-C stretching and symmetric N=O stretching             |
| 1435w  | 1435m  | 1435m  | 1432m  | 1433m  | C-C stretching of the Pyrrole                                                            |
| 1507w  | 1507w  | 1507s  | 1506w  | 1506vs | Coupling of Pyrrole stretching and asymmetric N=O stretching                             |
| 1521s  | 1520s  | 1521s  | 1520s  | 1517s  | Coupling of the C(5,15- <i>meso</i> )-C(Pyrrole) stretching and Pyrrole in plane bending |
|        | 1540w  | 1540w  | 1540w  | 1542w  | Coupling of Benzene stretching and asymmetric N=O stretching                             |
| 1600s  | 1593m  | 1593m  | 1596m  | 1592m  | Benzene stretching                                                                       |
|        |        |        |        | 1601m  | Benzene stretching                                                                       |
| 2225s  |        |        |        |        | C≡N stretching                                                                           |
|        |        | 2853m  | 2850m  |        | C-H stretching (-CH <sub>3</sub> -, <i>sym</i> )                                         |
|        |        |        |        | 2883br | C-H stretching (-CH <sub>2</sub> -, <i>sym</i> )                                         |
|        |        | 2920s  | 2921s  |        | C-H stretching (-CH <sub>3</sub> -, <i>asym</i> )                                        |
|        |        | 2953a  | 2959s  |        | C-H stretching (-CH <sub>3</sub> -, <i>asym</i> )                                        |
|        |        |        |        | 2970s  | C-H stretching (-CH <sub>2</sub> -, <i>asym</i> )                                        |
| 3062w  | 3058w  | 3054w  | 3058w  | 3060w  | aromatic C-H stretching                                                                  |

<sup>a</sup> Shulder band.

**Table S3.** Half-wave and peak potentials (V vs SCE) for the oxidations and reductions of  $[\text{Co}(\rho\text{-RPh})_2(\rho\text{-NO}_2\text{Ph})]\text{Co}(\text{PPh}_3)$  (**1-5**) in  $\text{CH}_2\text{Cl}_2$  containing 0.1 M TBAP.

| Compound | R                         | Oxidation    |              |                 | Reduction |                                 |          |
|----------|---------------------------|--------------|--------------|-----------------|-----------|---------------------------------|----------|
|          |                           | $E_{1/2}(2)$ | $E_{1/2}(1)$ | $\Delta E(2-1)$ | $E_p(1)$  | $E_{1/2}(\text{NO}_2\text{Ph})$ | $E_p(2)$ |
| <b>1</b> | CN                        | 1.04         | 0.65         | 0.39            | -0.53     | -1.06                           | -1.53    |
| <b>2</b> | F                         | 0.95         | 0.57         | 0.38            | -0.66     | -1.13                           | -1.64    |
| <b>3</b> | $\text{CH}_3$             | 0.93         | 0.53         | 0.4             | -0.70     | -1.15                           | -1.69    |
| <b>4</b> | $\text{C}(\text{CH}_3)_3$ | 0.91         | 0.53         | 0.38            | -0.73     | -1.14                           | -1.70    |
| <b>5</b> | $\text{PhCH}_2\text{O}$   | 0.87         | 0.52         | 0.35            | -0.72     | -1.14                           | -1.69    |

Scan rate 100 mV/s.
